# Supplementary material for: Pharmacological Inhibition of Myocardin-related Transcription Factor Pathway Blocks Lung Metastases of RhoC-Overexpressing Melanoma
Source: Oxford University Press journal article supplement (doi:10.1158/1535-7163.mct-16-0482), 2016-11-11
Supplement: 15357163mct160482-sup-169356_1_supp_3689444_zzhnzx.docx [file 15357163mct160482-sup-169356_1_supp_3689444_zzhnzx.docx]

**
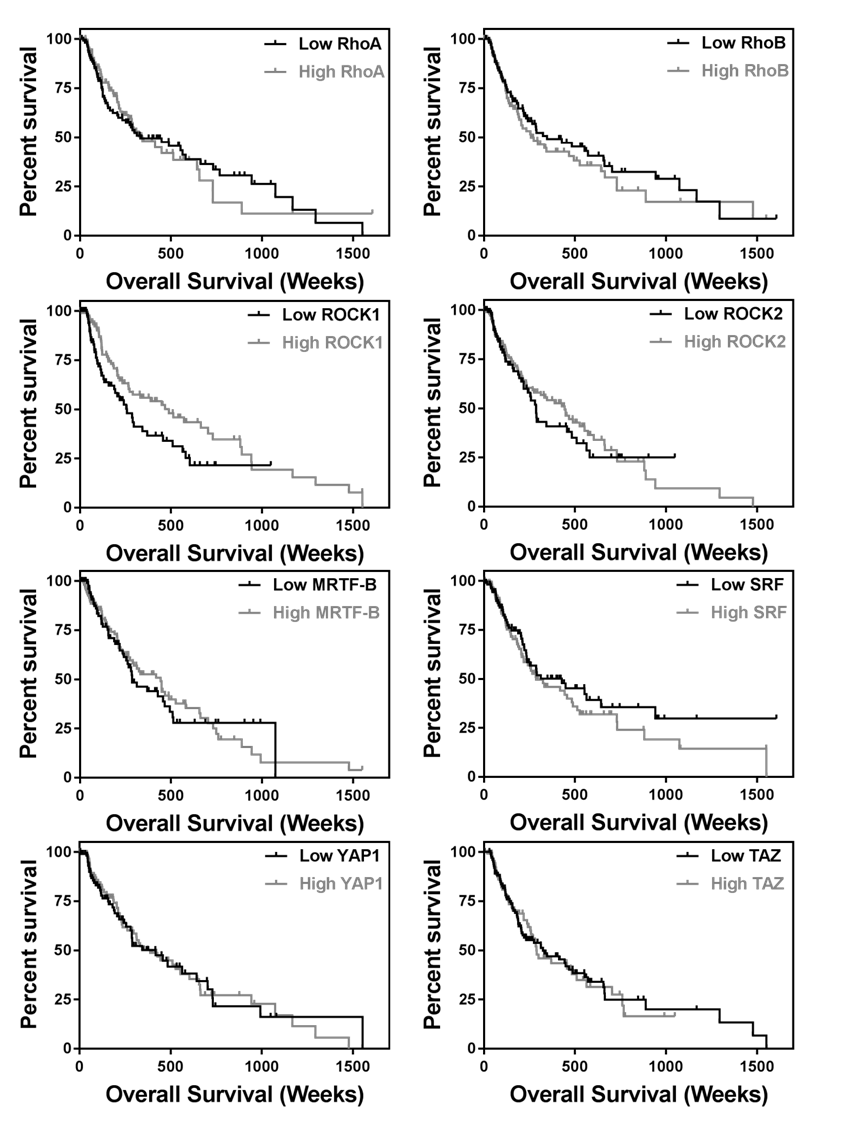
**

**Figure S1.** The Cancer Genome Atlas (TCGA) cutaneous melanoma dataset was stratified into quartiles based upon expression ofindicated genes. Kaplan-Meier plots were generated from the highest (grey) and lowest (black) expressing quartiles. Survival curves were analyzed with the log-rank test with a cutoff of P < 0.05 as statistically significant.
